# Supplementary material for: Pro-resolving actions and stereoselective biosynthesis of 18S E-series resolvins in human leukocytes and murine inflammation
Source: JCI journal article supplement (doi:10.1172/jci42545), 2011-01-04
Supplement: sd1 [file 1]

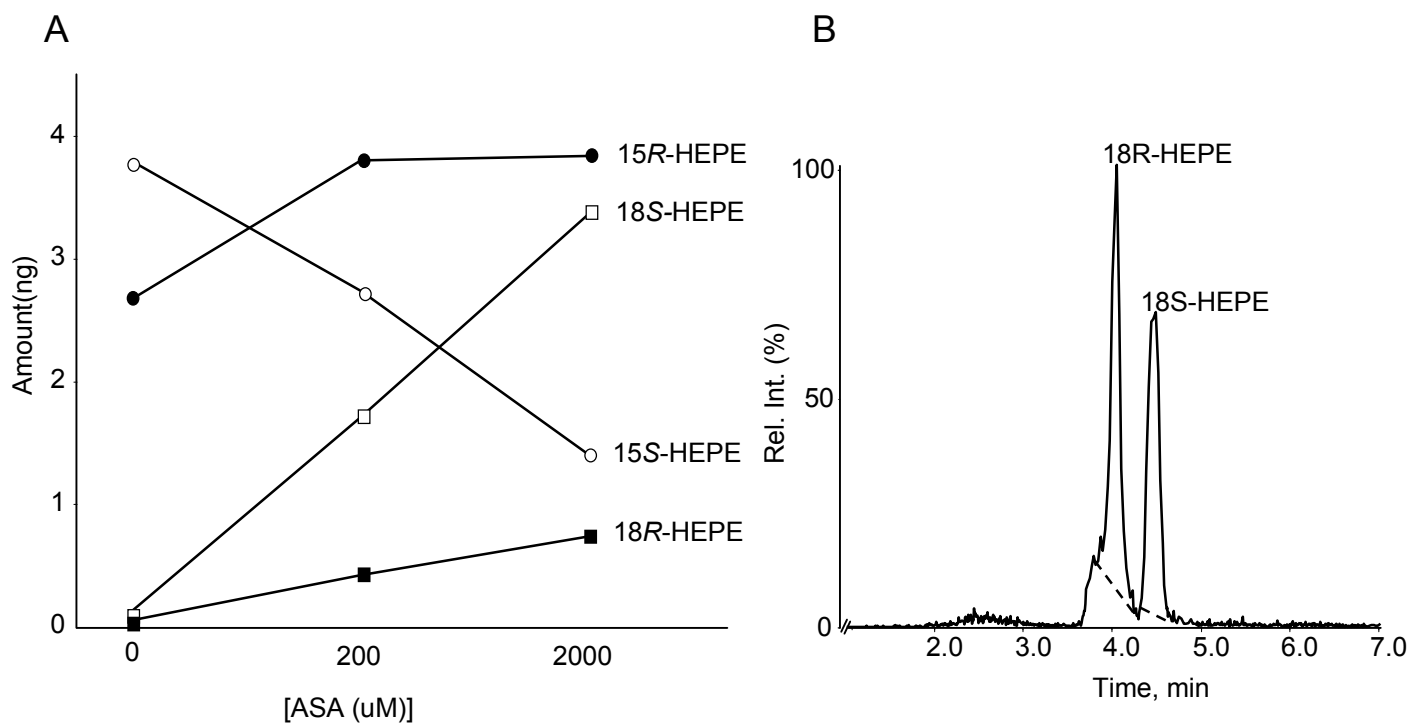

**Figure S1.**

Aspirin treatment increases preferential generation of 18S-HEPE. A) Human recombinant COX-2 generates both 18S-HEPE and 15R-HEPE. Human recombinant COX-2 was treated with different concentrations of aspirin and incubated for 30 min; then 15 $\mu$ M EPA was added and further incubated for 30 min. 15S-HEPE (open circle), 15R-HEPE (closed circle), 18S-HEPE (open square) and 18R-HEPE (closed square) were individually quantified by chiral LC-UV-MS-MS. Results are representative of three independent experiments. B) 18S-HEPE production is increased with aspirin treatment in a murine air pouch model. TNF- $\alpha$  (100ng) was injected into 6-day air pouch raised in mouse dorsal skin, followed by 500 $\mu$ g aspirin (3.5 hours post-TNF- $\alpha$ ) and 300 $\mu$ g EPA (4 hours post TNF- $\alpha$ ). Mice were sacrificed at 6 hours after initial TNF- $\alpha$  injection and 18R/S-HEPE were identified with chiral lipidomic analysis. Aspirin plus EPA treatment increased both 18R/S-HEPE levels when compared to EPA-only treatment (2.4ng to 14ng, ~6-fold increase) and changed the 18R/S ratio to more S-favorable (1.5:1 to 1:1).

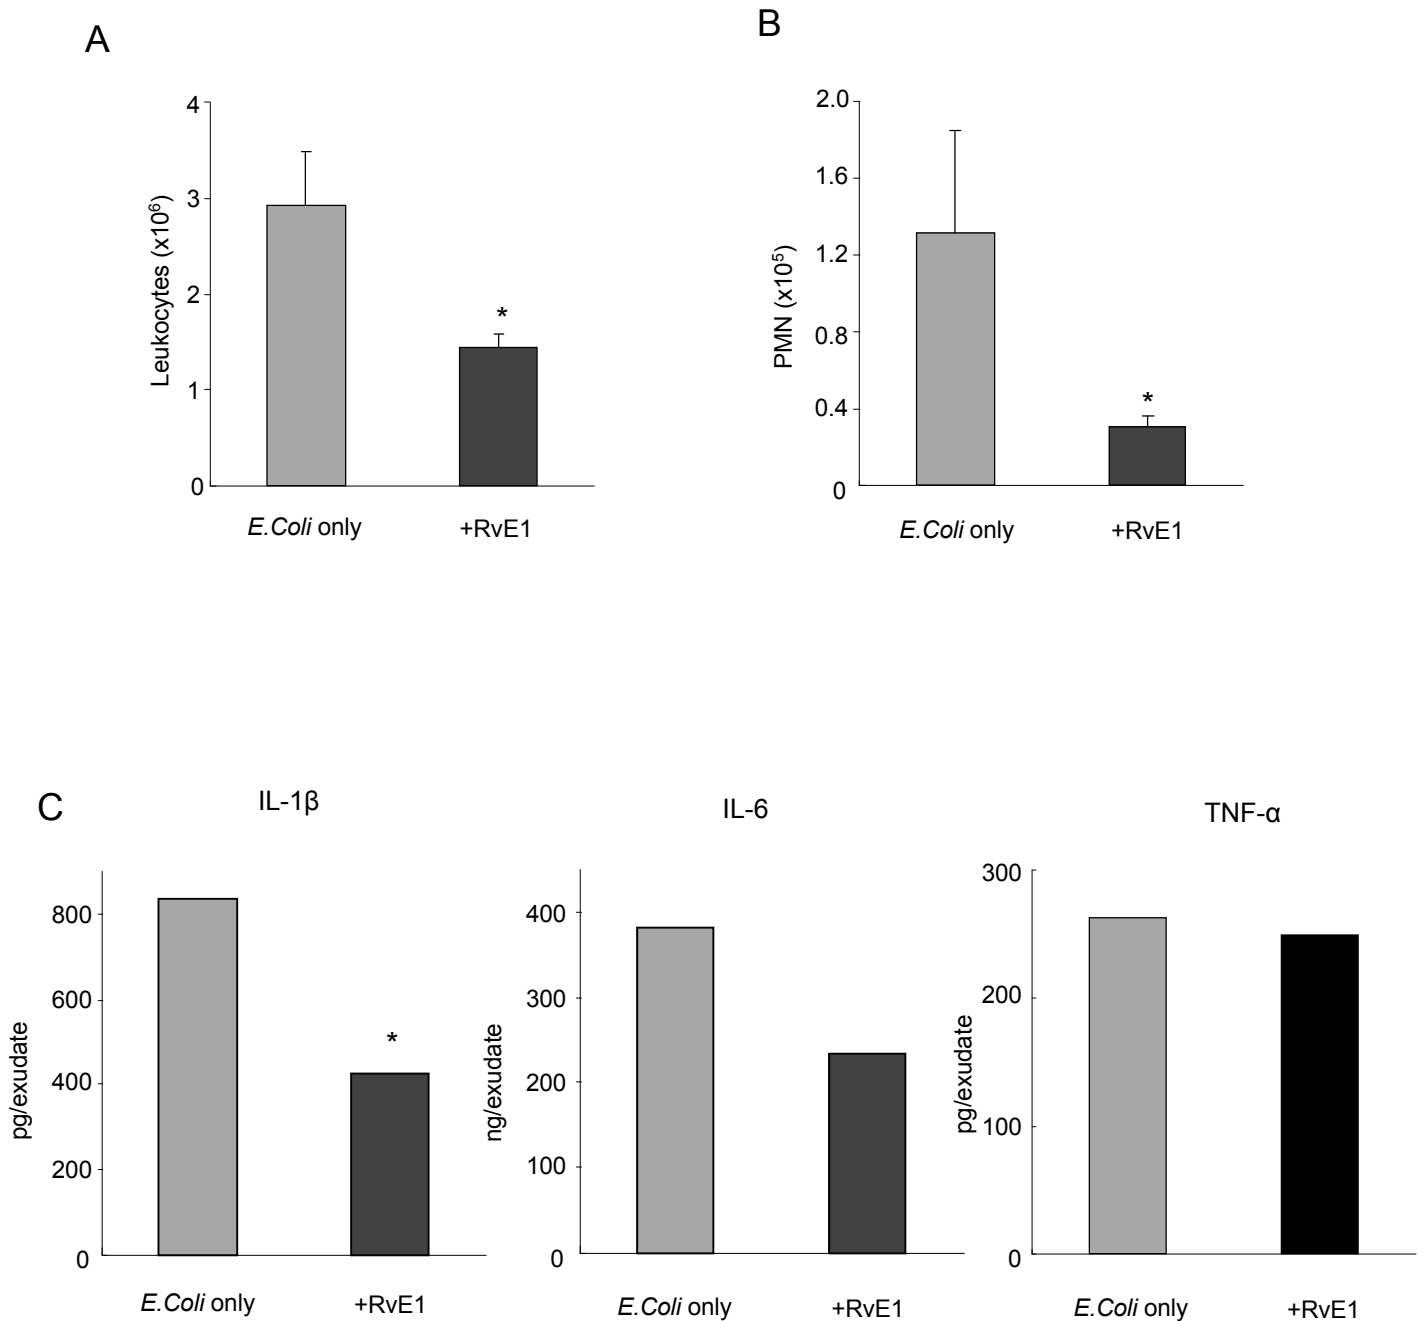

**Figure S2.**

RvE1 actions in *E. coli* peritonitis. 100ng RvE1 was administered i.v. immediately before *E. coli* peritoneal injection (107 CFU). Four hours later, exudates were obtained by lavage, A) total leukocyte and B) PMN numbers were enumerated, C) cytokine levels. \*;  $p < 0.05$  compared to vehicle-treated animals.
